# Supplementary material
Source: Springer Nature journal article supplement (https://www.springermedizin.de/resource/supplementary/12885_2007_989_MOESM2_ESM.pdf/9471848)

DIOC<sub>2</sub>(3)

Rhodamine

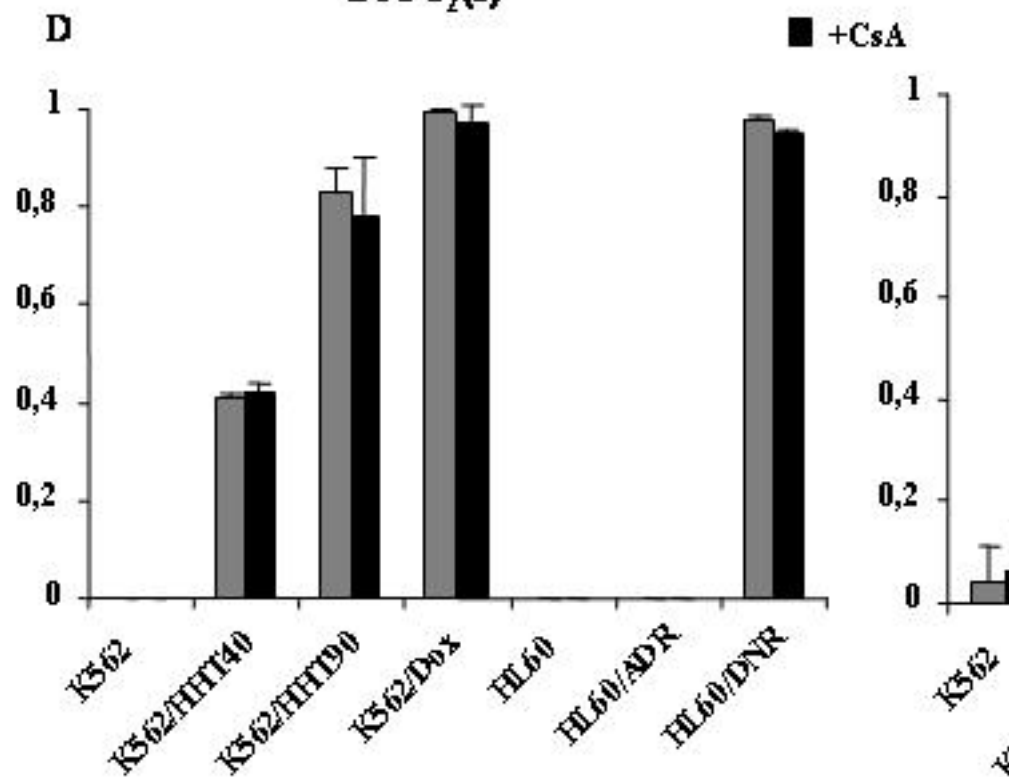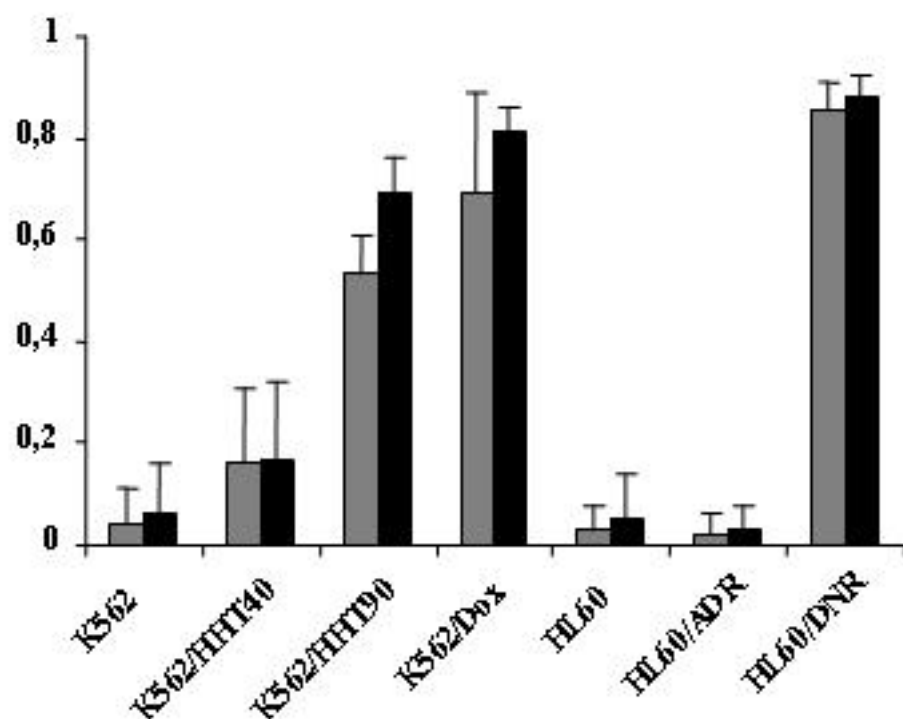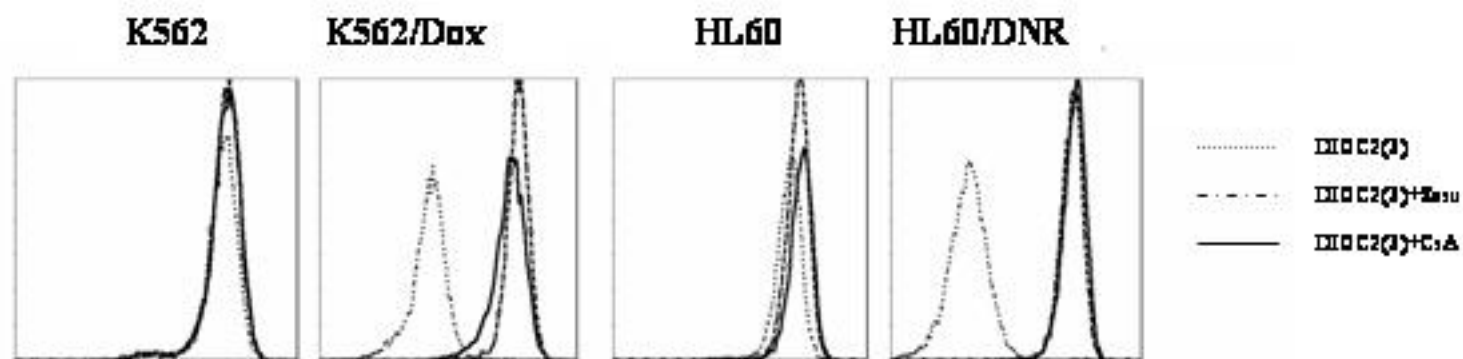

Supplement: MOESM2 [file 9471848]
